# Supplementary material
Source: PubMed Central journal article supplement (PMC4068580)
Supplement: AAC.02472-14_zac007142997so1.pdf [file AAC.02472-14_zac007142997so1.pdf]

**Table S1.** Quinine IC<sub>50</sub> of *P.falciparum* isolates and polymorphism in *Pfnhe1*, *Pfmdr1* -86, -184 and *Pfcr1* -76

| Isolate ID | Quinine IC <sub>50</sub> (nM) | <i>Pfnhe1</i> ms4760 repeats |            |             | ms4760 profile No | <i>Pfmdr1</i> -86 | <i>Pfmdr1</i> -184 | <i>Pfcr1</i> -76 |
|------------|-------------------------------|------------------------------|------------|-------------|-------------------|-------------------|--------------------|------------------|
|            |                               | DDNND                        | DDNNDNHNND | DDNNNDNHNND |                   |                   |                    |                  |
| KCH 10/85  | 72.45                         | 1                            | 2          | 1           | KF719186          | N                 | F                  | K                |
| KCH 10/88  | 80.1                          | 1                            | 2          | 1           | 53                | N                 | F                  | T                |
| KCH 10/89  | 17.84                         | 1                            | 2          | 1           | 53                | N                 | Y                  | K                |
| KCH 11/143 | 437.55                        | 3                            | 2          | 1           | 9                 | Y                 | F                  | K                |
| KDH 10/324 | 87.2                          | 2                            | 1          | 1           | KF719185          | N                 | Y                  | K                |
| KDH 10/328 | 418.9                         | 2                            | 1          | 1           | KF719185          | Y                 | Y                  | T                |
| KDH 10/329 | 50.77                         | 2                            | 1          | 1           | KF719185          | N                 | F                  | T                |
| KDH 10/330 | 45.67                         | 1                            | 2          | 1           | 3                 | N                 | Y                  | T                |
| KDH 10/334 | 95.45                         | 2                            | 2          | 1           | KF719183          | N                 | Y                  | T                |
| KDH 10/337 | 44.78                         | 3                            | 1          | 1           | 2                 | N                 | Y                  | T                |
| KDH 10/338 | 237.74                        | 1                            | 1          | 1           | KF719185          | Y                 | Y                  | K                |
| KDH 10/343 | 684.55                        | 2                            | 1          | 1           | 9                 | Y                 | F                  | K                |
| KDH 10/352 | 38.9                          | 3                            | 2          | 1           | 2                 | N                 | Y                  | T                |
| KDH 10/362 | 62.95                         | 1                            | 1          | 0           | 8                 | N                 | Y                  | K                |
| KDH 10/363 | 118.38                        | 3                            | 3          | 1           | 2                 | N                 | F                  | T                |
| KDH 10/365 | 131.5                         | 1                            | 1          | 1           | 1                 | N                 | F                  | T                |
| KDH 10/366 | 57.79                         | 2                            | 2          | 1           | 20                | N                 | Y                  | K                |
| KDH 10/367 | 79                            | 1                            | 2          | 1           | 1                 | N                 | Y                  | T                |
| KDH 10/487 | 310.98                        | 1                            | 2          | 1           | 1                 | Y                 | F                  | T                |
| KDH 10/488 | 331.03                        | 2                            | 2          | 1           | 9                 | Y                 | F                  | K                |
| KDH 10/490 | 2.08                          | 3                            | 2          | 1           | 9                 | N                 | Y                  | T                |
| KDH 10/493 | 56.54                         | 2                            | 1          | 1           | 3                 | N                 | Y                  | K                |
| KDH 10/494 | 33.67                         | 1                            | 2          | 1           | 9                 | N                 | F                  | T                |
| KDH 10/498 | 43.13                         | 2                            | 2          | 1           | 3                 | Y                 | F                  | T                |
| KDH 10/501 | 235.5                         | 2                            | 2          | 0           | 8                 | Y                 | F                  | K                |
| KDH 10/502 | 1779.05                       | 3                            | 3          | 1           | KF719182          | N                 | Y                  | K                |
| KDH 10/503 | 9.26                          | 2                            | 2          | 1           | 1                 | N                 | F                  | K                |
| KDH 10/510 | 162.45                        | 3                            | 2          | 1           | 9                 | N                 | F                  | K                |
| KDH 10/511 | 2.82                          | 1                            | 2          | 1           | 1                 | N                 | Y                  | K                |
| KDH 10/514 | 113.19                        | 2                            | 2          | 1           | 9                 | N                 | F                  | K                |
| KDH 10/516 | 162.45                        | 3                            | 2          | 1           | KF719185          | N                 | Y                  | K                |
| KDH 10/519 | 17.59                         | 2                            | 1          | 1           | KF719185          | N                 | Y                  | T                |
| KDH 10/520 | 1508.3                        | 2                            | 1          | 1           | KF719185          | Y                 | F                  | K                |
| KDH 10/533 | 103.55                        | 2                            | 1          | 1           | 1                 | Y                 | F                  | K                |
| KDH 10/535 | 4.39                          | 2                            | 2          | 1           | 1                 | N                 | Y                  | T                |
| KDH 10/543 | 10.3                          | 2                            | 2          | 1           | 16                | N                 | Y                  | T                |
| KDH 10/544 | 10.51                         | 3                            | 1          | 1           | 4                 | N                 | Y                  | T                |
| KDH 11/612 | 113.19                        | 2                            | 2          | 1           | 1                 | N                 | F                  | K                |
| KDH 11/620 | 172.03                        | 1                            | 2          | 1           | 3                 | N                 | F                  | T                |
| KDH 11/629 | 19.18                         | 2                            | 2          | 1           | 1                 | N                 | Y                  | K                |
| KDH 11/632 | 2.68                          | 2                            | 2          | 1           | 3                 | N                 | Y                  | T                |
| KDH 11/633 | 9.66                          | 3                            | 1          | 1           | 4                 | N                 | Y                  | T                |
| KDH 11/639 | 31.35                         | 2                            | 2          | 1           | 1                 | N                 | Y                  | T                |
| KDH 11/641 | 943.17                        | 1                            | 2          | 1           | 3                 | Y                 | F                  | T                |
| KDH 11/643 | 587.61                        | 3                            | 1          | 1           | 4                 | Y                 | F                  | K                |
| KDH 11/644 | 0.39                          | 2                            | 2          | 1           | 1                 | N                 | Y                  | T                |
| KDH 11/648 | 21.32                         | 1                            | 2          | 1           | 20                | N                 | Y                  | T                |
| KDH 11/652 | 462.45                        | 2                            | 2          | 1           | 1                 | Y                 | F                  | K                |
| KDH 11/654 | 74.24                         | 3                            | 1          | 1           | KF719184          | N                 | Y                  | K                |
| KDH 11/656 | 499.49                        | 2                            | 2          | 1           | 1                 | Y                 | F                  | K                |
| KDH 11/657 | 1611.75                       | 3                            | 1          | 1           | 4                 | Y                 | F                  | K                |
| KDH 11/662 | 1784.16                       | 3                            | 1          | 1           | 4                 | Y                 | F                  | K                |
| KDH 11/664 | 871.39                        | 3                            | 2          | 1           | 9                 | Y                 | F                  | K                |
| KDH 11/665 | 1808.43                       | 3                            | 2          | 1           | 9                 | Y                 | F                  | K                |
| KDH 11/668 | 348.15                        | 3                            | 2          | 1           | 9                 | Y                 | F                  | K                |
| KDH 11/675 | 38.38                         | 2                            | 2          | 1           | 1                 | N                 | Y                  | T                |
| KDH 11/688 | 58.51                         | 1                            | 2          | 1           | 3                 | N                 | F                  | T                |
| KDH 11/689 | 253.38                        | 2                            | 2          | 1           | 1                 | N                 | F                  | T                |
| KDH 11/691 | 18.19                         | 1                            | 2          | 1           | 3                 | N                 | Y                  | T                |
| KDH 11/695 | 47.54                         | 3                            | 2          | 1           | 9                 | N                 | Y                  | T                |
| KDH 11/697 | 3586.21                       | 3                            | 2          | 1           | 9                 | Y                 | F                  | T                |
| KDH 11/700 | 0.54                          | 3                            | 2          | 1           | 9                 | N                 | Y                  | T                |
| KDH 11/701 | 9.37                          | 1                            | 2          | 1           | 3                 | N                 | Y                  | T                |
| KDH 11/703 | 20.18                         | 2                            | 2          | 1           | 1                 | N                 | Y                  | T                |
| KDH 11/704 | 43.51                         | 1                            | 2          | 1           | 3                 | N                 | Y                  | T                |
| KDH 11/705 | 36.02                         | 2                            | 2          | 1           | 1                 | N                 | Y                  | T                |
| KDH 11/713 | 0.22                          | 3                            | 1          | 1           | 4                 | N                 | Y                  | T                |
| KDH 11/714 | 4.82                          | 2                            | 1          | 1           | KF719182          | N                 | Y                  | T                |
| KDH 11/738 | 10.47                         | 2                            | 2          | 1           | 1                 | N                 | Y                  | T                |
| KDH 11/742 | 0.21                          | 3                            | 1          | 1           | KF719183          | N                 | Y                  | T                |
| KSI 10/095 | 315.71                        | 3                            | 1          | 1           | KF719183          | Y                 | F                  | K                |
| KSI 10/104 | 65.56                         | 2                            | 2          | 1           | 1                 | N                 | F                  | T                |
| KSI 10/108 | 337.68                        | 2                            | 2          | 1           | 1                 | Y                 | F                  | K                |
| KSI 10/111 | 774.71                        | 3                            | 2          | 1           | 9                 | Y                 | F                  | K                |
| KSI 10/113 | 661.05                        | 2                            | 1          | 1           | 6                 | Y                 | F                  | K                |
| KSI 10/115 | 10.18                         | 2                            | 2          | 1           | 1                 | N                 | Y                  | T                |
| KSI 10/172 | 590.17                        | 3                            | 1          | 1           | 4                 | Y                 | F                  | K                |
| KSI 11/164 | 19                            | 2                            | 2          | 1           | 1                 | N                 | F                  | T                |
| KSI 11/004 | 105.5                         | 1                            | 2          | 1           | 3                 | Y                 | F                  | T                |
| KSI 11/021 | 1180.97                       | 3                            | 1          | 1           | 4                 | N                 | F                  | T                |
| KSI 11/023 | 105.5                         | 1                            | 2          | 1           | 3                 | N                 | Y                  | T                |
| KSI 11/026 | 26.59                         | 2                            | 1          | 1           | 6                 | N                 | Y                  | T                |
| KSI 11/165 | 551.98                        | 1                            | 2          | 1           | 53                | Y                 | F                  | K                |
| KSI 11/190 | 22.07                         | 1                            | 1          | 1           | 2                 | N                 | Y                  | T                |
| KSI 11/191 | 24.62                         | 1                            | 2          | 1           | 3                 | N                 | Y                  | T                |
| KSI 11/194 | 10.24                         | 2                            | 2          | 1           | 1                 | N                 | Y                  | T                |
| MDH 10/015 | 2012.77                       | 1                            | 2          | 1           | 3                 | Y                 | F                  | T                |
| MDH 10/020 | 10.84                         | 1                            | 2          | 1           | 3                 | N                 | Y                  | T                |

Y- Tyrosine, F- Phenylalanine, N- Asparagine, T- Threonine, K- Lysine, D- Aspartic acid and H- Histidine. KF719182- KF719186: GenBank accession #

**Table S2.** Phenotypic characteristic of the parasite as determined by genotype outside the interquartile range (below 25% and above 75%)

**BELOW 25% (interquartile range)**

| DNNND repeats | Summary |         |        | Total |
|---------------|---------|---------|--------|-------|
|               | MDR 86  | MDR 184 | CRT 76 |       |
| 1             | N       | Y       | T      | 17    |
| 1             | N       | Y       | K      |       |
| 1             | N       | Y       | K      |       |
| 1             | N       | Y       | T      | 4     |
| 1             | N       | Y       | K      |       |
| 2             | N       | Y       | K      | 2     |
| 2             | N       | F       | T      |       |
| 2             | N       | Y       | K      | 5     |
| 2             | N       | Y       | K      |       |
| 2             | N       | Y       | K      | 12    |
| 2             | N       | Y       | K      |       |
| 2             | N       | F       | T      | 6     |
| 2             | N       | Y       | T      |       |
| 2             | N       | Y       | K      | 23    |
| 2             | N       | Y       | K      |       |
| 2             | N       | Y       | K      | 23    |
| 2             | N       | Y       | K      |       |
| 2             | N       | Y       | K      | 23    |
| 2             | N       | Y       | K      |       |
| 2             | N       | Y       | K      | 23    |
| 2             | N       | F       | T      |       |
| 2             | N       | Y       | T      | 23    |
| 2             | N       | Y       | K      |       |
| 3             | N       | Y       | K      | 23    |
| 3             | N       | Y       | K      |       |
| 3             | N       | Y       | K      | 23    |
| 3             | N       | Y       | K      |       |
| 3             | N       | Y       | K      | 23    |
| 3             | N       | Y       | K      |       |
| 3             | N       | Y       | K      | 23    |
| 3             | N       | Y       | K      |       |

  

| Summary        |         |        | Total |
|----------------|---------|--------|-------|
| MDR 86         | MDR 184 | CRT 76 |       |
| N              | Y       | K      | 17    |
| N              | Y       | T      | 4     |
| N              | F       | T      | 2     |
| DNNND repeats  |         |        | Total |
| 1              |         |        | 5     |
| 2              |         |        | 12    |
| 3              |         |        | 6     |
| Combined total |         |        | 23    |

**ABOVE 75% (interquartile range)**

| DNNND repeats | Summary |         |        | Total |
|---------------|---------|---------|--------|-------|
|               | MDR 86  | MDR 184 | CRT 76 |       |
| 1             | Y       | F       | T      | 18    |
| 1             | Y       | F       | K      |       |
| 1             | Y       | F       | T      |       |
| 2             | Y       | F       | T      | 1     |
| 2             | Y       | Y       | T      |       |
| 2             | Y       | F       | T      | 1     |
| 2             | Y       | F       | T      |       |
| 2             | Y       | F       | T      | 1     |
| 2             | Y       | F       | T      |       |
| 2             | Y       | F       | T      | 1     |
| 2             | Y       | F       | T      |       |
| 3             | Y       | F       | T      | 7     |
| 3             | Y       | F       | T      |       |
| 3             | Y       | F       | T      | 12    |
| 3             | Y       | F       | T      |       |
| 3             | Y       | F       | T      | 22    |
| 3             | Y       | F       | T      |       |
| 3             | Y       | F       | T      | 22    |
| 3             | N       | F       | T      |       |
| 3             | Y       | F       | T      | 22    |
| 3             | N       | Y       | T      |       |
| 3             | Y       | F       | T      | 22    |
| 3             | Y       | F       | T      |       |
| 3             | Y       | F       | T      | 22    |
| 3             | Y       | F       | T      |       |

  

| Summary        |         |        | Total |
|----------------|---------|--------|-------|
| MDR 86         | MDR 184 | CRT 76 |       |
| Y              | F       | T      | 18    |
| N              | Y       | T      | 1     |
| N              | F       | T      | 1     |
| Y              | Y       | T      | 1     |
| Y              | F       | K      | 1     |
| DNNND repeats  |         |        | Total |
| 1              |         |        | 3     |
| 2              |         |        | 7     |
| 3              |         |        | 12    |
| Combined total |         |        | 22    |

The single letter codes (Y, F, T, K, N and D) represent the amino acid at specified codons of *P.falciparum* gene (*Pfmdr1* -86, -184 and *Pfcrtr* -76)  
 The different colors (yellow, green, pink, purple and blue) represent different haplotype based on the three codons (*Pfmdr1* -86, -184 and *Pfcrtr* -76)  
 The light, sky and dark blue represent the varying (1, 2 and 3) number of DNNND repeats.
